# Supplementary material for: Synergistic effect between eosin Y and rhodamine B on a photoelectrode coated with Pt nanoparticle-decorated graphene
Source: Royal Society of Chemistry journal article supplement (doi:10.1039/c5ra24178b), 2015-01-01
Supplement: c5ra24178b1.pdf [file c5ra24178b1.pdf]

## Supplementary Data

### **Synergistic effect between Eosin Y and Rhodamine B on a photoelectrode coated with the Pt nanoparticles decorated graphene**

Wenjiu Wang<sup>a</sup>, Shi-Zhao Kang<sup>a,\*</sup>, Dong Wang<sup>b</sup>, Xiangqing Li<sup>a</sup>, Lixia Qin<sup>a</sup>, Jin Mu<sup>a,\*</sup>

*<sup>a</sup>School of Chemical and Environmental Engineering, Shanghai Institute of Technology, 100 Haiquan Road, Shanghai 201418, China*

*<sup>b</sup>Key Laboratory of Molecular Nanostructure and Nanotechnology, Institute of Chemistry, Chinese Academy of Sciences, and Beijing National Laboratory for Molecular Sciences, Beijing 100190, China*

\* Corresponding author: Jin Mu and Shi-Zhao Kang, Tel./fax: +86 21 60873061.

*E-mail address:* kangsz@sit.edu.cn (S.-Z. Kang)

Supplementary Fig. S1

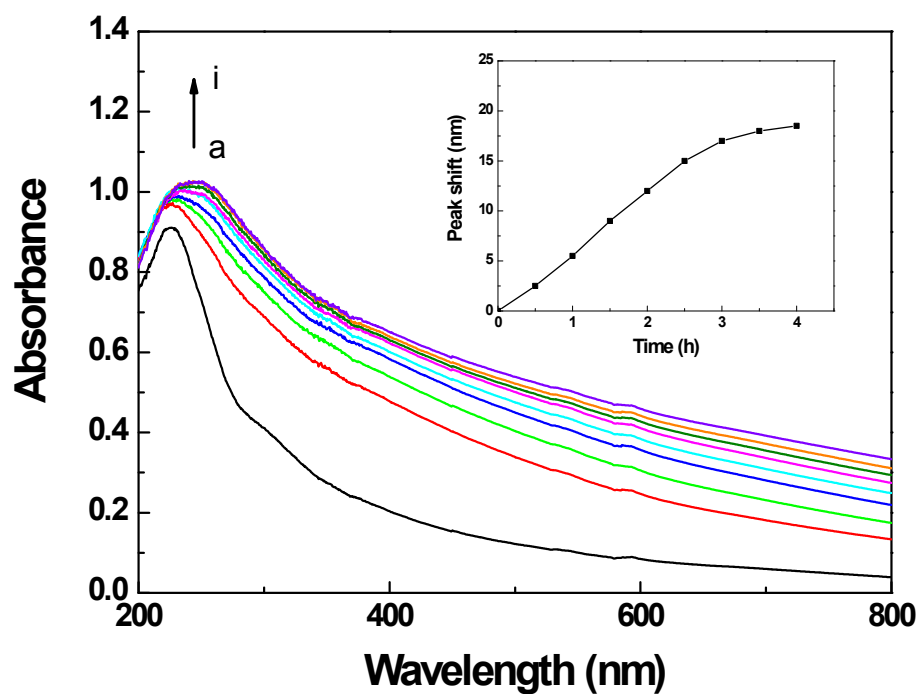

**Fig. S1.** UV-vis spectra of GO-Pt (a) and rGO-Pt after photoreduced for 0.5 h (b), 1 h (c), 1.5 h (d), 2 h (e), 2.5 h (f), 3 h (g), 3.5 h (h) and 4 h (i); the insert shows peak shift values as a function the irradiation time.

Supplementary Fig. S2

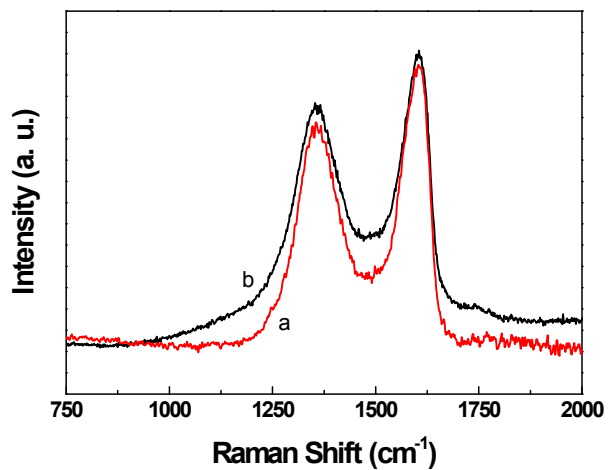

Fig. S2. Raman spectra of GO-Pt (a) and rGO-Pt (b).

Supplementary Fig. S3

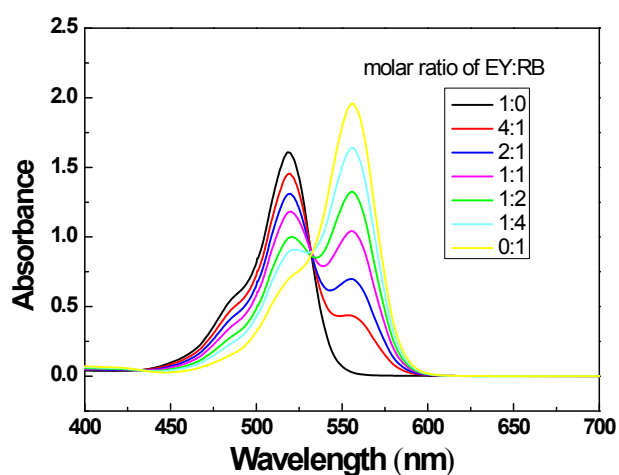

Fig. S3. UV-vis spectra of ER with various molar ratio of EY to RB. (Dye concentration: ER (m:n)  $2 \times 10^{-5} \text{ mol} \cdot \text{L}^{-1}$ ; TEOA concentration: 15 vol.%;  $\text{Na}_2\text{SO}_4$  concentration  $0.1 \text{ mol} \cdot \text{L}^{-1}$ ; pH 7)

Supplementary Fig. S4

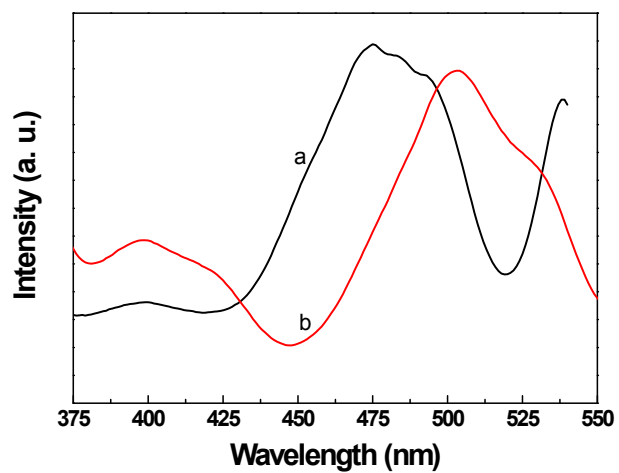

**Fig. S4** Excitation spectra of EY (a) and RB (b). (Dye concentration: EY  $5 \times 10^{-5}$  mol·L<sup>-1</sup>, RB  $5 \times 10^{-5}$  mol·L<sup>-1</sup>; TEOA concentration: 15 vol.%; Na<sub>2</sub>SO<sub>4</sub> concentration 0.1 mol·L<sup>-1</sup>; pH 7; emission wavelength: (a) 551 nm, (b) 593 nm)

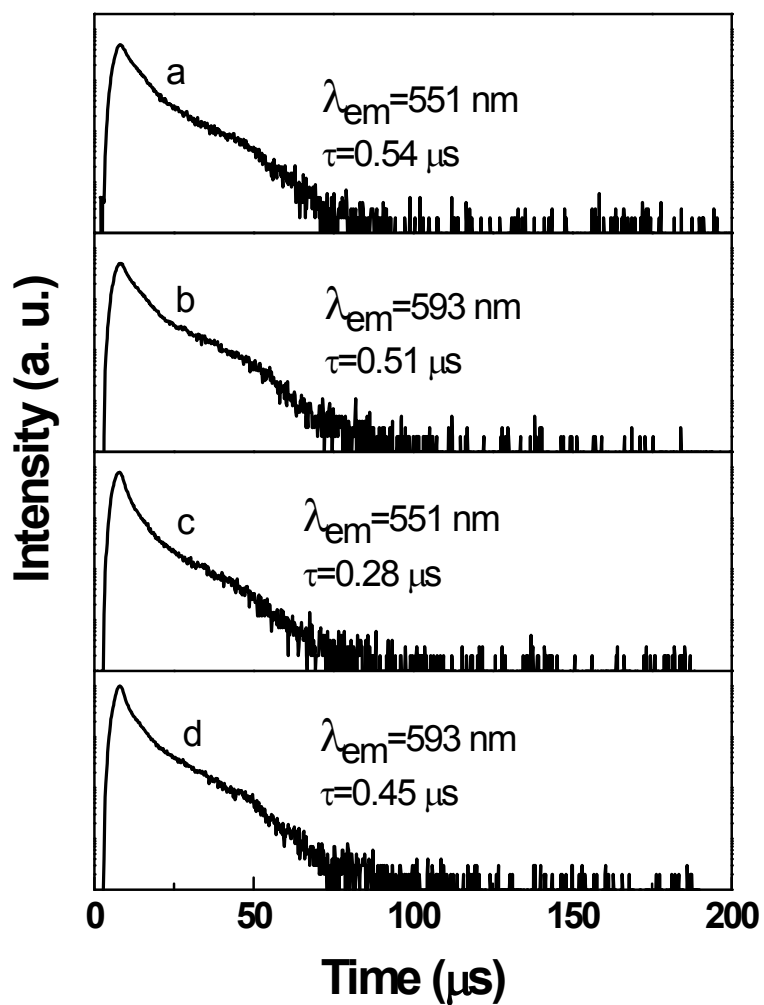

**Fig. S5** Luminescence decay profiles of EY (a), RB (b) and ER (1:1) (c, d) excited at 475 nm. (Dye concentration: EY  $5 \times 10^{-5}$  mol·L<sup>-1</sup>, RB  $5 \times 10^{-5}$  mol·L<sup>-1</sup>, ER (1:1)  $1 \times 10^{-4}$  mol·L<sup>-1</sup>; TEOA concentration: 15 vol.%; Na<sub>2</sub>SO<sub>4</sub> concentration 0.1 mol·L<sup>-1</sup>; pH 7; monitored emission: (a) 551 nm, (b) 593 nm, (c) 551 nm, (d) 593 nm)

Supplementary Fig. S6

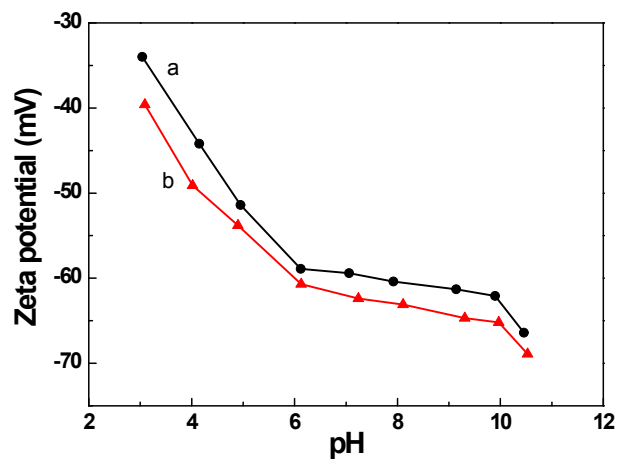

**Fig. S6** pH dependence of the Zeta potentials for rGO-5%Pt (a) and RGO (b). (RGO  $0.1 \text{ mg}\cdot\text{mL}^{-1}$ ; rGO-5%Pt  $0.1 \text{ mg}\cdot\text{mL}^{-1}$ , KCl  $1 \text{ mmol}\cdot\text{L}^{-1}$ )
